# Supplementary material
Source: Springer Nature journal article supplement (https://www.springermedizin.de/resource/supplementary/12967_2011_976_MOESM1_ESM.pdf/9577242)

**A**

Step 1: Block insulin-bound magnetic beads, 15 min - 1 hr

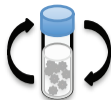

Step 2: Incubate serum with beads, 30 min - 1 hr

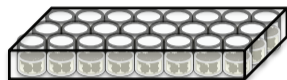

~Shaking~

Step 3: Wash

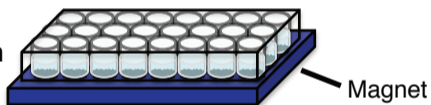

Step 4: Add Ru-tagged secondary

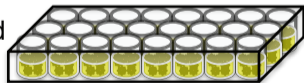

Step 5: Place in M1MR analyzer to incubate & shake 30 min then read

**B**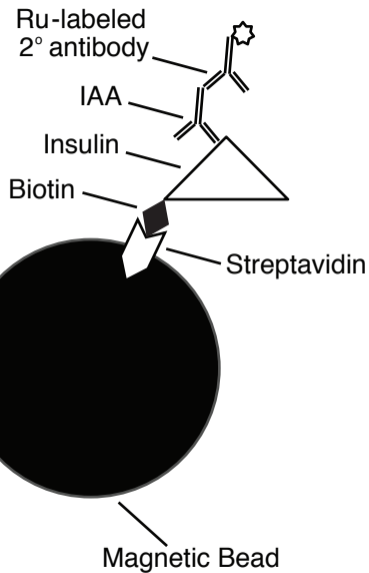

Supplement: MOESM1 [file 9577242]
